# Supplementary material
Source: PubMed Central journal article supplement (PMC6287872)
Supplement: ASN.2018040392SupplementaryData1.pdf [file ASN.2018040392SupplementaryData1.pdf]

**SUPPLEMENTAL MATERIAL**

| <b>Table of Contents</b>                                                                                                                                                                          | <b>Page</b> |
|---------------------------------------------------------------------------------------------------------------------------------------------------------------------------------------------------|-------------|
| <b>1 - Supplemental Methods</b>                                                                                                                                                                   | <b>3</b>    |
| 1.1 - Cell culture and reagents                                                                                                                                                                   | 3           |
| 1.2 - EdU proliferation assay                                                                                                                                                                     | 4           |
| 1.3 - Damage protocol                                                                                                                                                                             | 4           |
| 1.4 - Secondary screen (selection of the eight hit compounds- only HPTECs)                                                                                                                        | 5           |
| 1.5 - In vitro damage models and selection of final compound - only HPTECs                                                                                                                        | 5           |
| 1.6 - Experiment with different DYRK inhibitors after damage - only HPTECs                                                                                                                        | 6           |
| 1.7 - Dose-response experiments with ID-8 and Harmine – HPTECs and fibroblasts                                                                                                                    | 6           |
| 1.8 - Cell isolation, culture and seeding in 3 dimensional microphysiological system (3D MPS) platform                                                                                            | 6           |
| 1.9 - Library preparation and RNAsequencing                                                                                                                                                       | 7           |
| 1.10 Immunofluorescence                                                                                                                                                                           | 8           |
| 1.11 - Western blot                                                                                                                                                                               | 9           |
| 1.12 - References for Supplemental Methods                                                                                                                                                        | 10          |
| <b>2 - Supplemental Tables</b>                                                                                                                                                                    | <b>11</b>   |
| 2.1 - Supplemental Table 1. List of antibodies used for immunocytochemistry, immunofluorescence and western blot                                                                                  | 11          |
| 2.2 - Supplemental Table 2. List of the selected 129 hit compounds in the primary screen                                                                                                          | 11          |
| 2.3 - Supplemental Table 3. Fold change and p values of cell cycle proteins modulated by the treatment with ID-8 or Harmine after different types of damage                                       | 15          |
| <b>3 - Supplemental Figures</b>                                                                                                                                                                   | <b>16</b>   |
| 3.1 - Supplemental Figure 1. Primary screen shows compounds with potential pro-proliferative effects in primary human proximal tubular epithelial cells (HPTECs)                                  | 16          |
| 3.2 - Supplemental Figure 2. Compounds CGS21680, ID-8, ZM336372 and PD151746 promoted proliferation of primary human proximal tubular epithelial cells (HPTECs) in, at least, two types of damage | 17          |
| 3.3 - Supplemental Figure 3. DYRK1A inhibitor ID-8 does not promote proliferation of NIH/3T3 fibroblasts after damage                                                                             | 18          |

|                                                                                                                                                                          |           |
|--------------------------------------------------------------------------------------------------------------------------------------------------------------------------|-----------|
| 3.4 - Supplemental Figure 4. ID-8 promotes proliferation of primary human proximal tubular epithelial cells (HPTECs) in 3 dimensional microphysiological system (3D MPS) | <b>19</b> |
| 3.5 - Supplemental Figure 5. RNA sequencing identifies differentially expressed genes after ID-8 and Harmine treatment post-damage                                       | <b>21</b> |

## 1 - Supplemental Methods

### 1.1 - Cell culture and reagents

HPTECs were purchased from Biopredic International (Rennes, France). Cells were cultured in collagen VI-coated flasks with DMEM/Ham's-F12 GlutaMAX medium (ThermoScientific) supplemented with 100 IU/mL penicillin/100 µg/mL streptomycin (Gibco), 36ng/mL hydrocortisone (HC, Sigma), 10 ng/mL epidermal growth factor (EGF, Promega), 1% insulin-transferrin-selenium (ITS, Lonza), and 4 pg/mL triiodothyronine (T3, Sigma) (Full medium). In screening experiments, HPTECs were kept in DMEM/Ham's-F12 GlutaMAX medium only supplemented with penicillin/ streptomycin (Free medium). Cells were maintained at 37°C in a humidified 5% CO<sub>2</sub> incubator and the medium was replaced one day after seeding and then every other day. For all experiments cells were used at passage 3.

Proliferation effect was compared to NIH 3T3 fibroblasts (ATCC, CRL-1658). Cells were cultivated in DMEM (ThermoScientific) supplemented with 10% bovine calf serum (BCS) and 100 IU/mL penicillin/100 µg/mL streptomycin (Gibco). In screening experiments BCS was reduced to 1%.

For the experiments with fibroblasts we followed the same experimental design used with HPTECs: cells were seeded in 96 well plates and kept in 1% bovine calf serum (BCS) for 48 hours. Induction of damage was performed using three different *in vitro* models of acute cell damage. 1) Hypoxia: (1% O<sub>2</sub>); 2) 15µM, 10µM, 5µM and 2.5µM cadmium chloride (CdCl<sub>2</sub>); 3) 5µM cyclosporine A (CycloA) or 75µM polymyxin (PMB) for 24h. The 15µM of CdCl<sub>2</sub> used to damage HPTECs induced complete cell death in fibroblasts and the experiments were carried out in three different concentrations (10µM, 5µM and 2.5µM) and we selected 5uM based on the amount of cell death of 20%,

ID-8 stimulates tubular proliferation measured by cell number after damage compared to undamaged cells. After 24h of damage, cells were treated with ID-8 or Harmine from 0.1nM to 1uM for 48h, or kept in 1% BCS medium. The proliferation effect was measured based on the percentage of EdU-labelled cells compared to the untreated control (1% BCS medium) in triplicates, from two biological replicates.

## **1.2 - EdU proliferation assay**

To evaluate the percentage of actively proliferating cells four hours before fixing the cells, a modified thymidine analog, EdU (Click-iT EdU Plus, Invitrogen) was added to each well with a final concentration of 10uM. After the incubation period cells were taken out of the incubator and all procedures were carried out at room temperature: cells were fixed with 4% of paraformaldehyde for 20 minutes, permeabilized with 100% ice cold methanol for 10 minutes and washed 3 x with 3% BSA in 1x PBS. EdU incorporation and detection were performed according to manufacturer's instructions. Nuclei were stained with 0.1 µg/ml Hoechst 33342 for 30 minutes in the dark. Fluorescence imaging was performed using an Operetta High-Content Imaging System (PerkinElmer) at 10X magnification, long WD objective, 17 fields/ well.

## **1.3 - Damage protocol**

To test the ability of compounds to induce proliferation after damage, primary HPTECs in passage 3 were seeded in collagen VI-coated 96 well plates (10,000 cells/well) and NIH/3T3 fibroblasts were seeded in 96 well plates (3,000 cells/well) using an automatic cell dispenser (WellMate, ThermoScientific). HPTECs were seeded in DMEM/Ham's-F12 GlutaMAX medium (ThermoScientific) supplemented with 100 IU/mL penicillin/100

ID-8 stimulates tubular proliferation  $\mu\text{g/mL}$  streptomycin (Gibco), 36  $\text{ng/mL}$  hydrocortisone (HC, Sigma), 10  $\text{ng/mL}$  epidermal growth factor (EGF, Promega), 1% insulin-transferrin-selenium (ITS, Lonza), and 4  $\text{pg/mL}$  triiodothyronine (T3, Sigma) and fibroblasts in DMEM, 10% BCS and 100 IU/mL penicillin/100  $\mu\text{g/mL}$  streptomycin (Gibco) (Full medium). On day 1 HPTEC full medium was replaced by new medium containing all the supplements described above, except for the EGF (EGF-free medium) and fibroblast full medium was replaced by DMEM, 10% BCS. Because this experiment resulted in cell loss and cell damage supplement-free medium was replaced by EGF-free medium in order to prevent excessive cell death. Cells were maintained in EGF-free medium or 1% BCS medium for 48 hours in order to abolish proliferation stimulus from the growth factor. On day 3 cells were either not damaged (control) or damaged with: 1) incubation at 1%  $\text{O}_2$  (Hypoxia); or 2) 15 $\mu\text{M}$  of cadmium chloride ( $\text{CdCl}_2$ ); or 3) 5 $\mu\text{M}$  of cyclosporine A (CycloA) or 75 $\mu\text{M}$  of polymyxin B (PMB) in EGF-free medium for 24h. On day 4, cells were maintained in EGF-free or 1% BCS medium (untreated and control groups) or treated with the following compounds:

#### **1.4 - Secondary screen (selection of the eight hit compounds - only HPTECs):**

treatment with 10 $\mu\text{M}$  and 30 $\mu\text{M}$  of CGS21680; 1 $\mu\text{M}$  and 3 $\mu\text{M}$  of GDC-0152; 10 $\mu\text{M}$  and 30 $\mu\text{M}$  of SB505124; 3 $\mu\text{M}$  and 10 $\mu\text{M}$  of ZM336372; 1 $\mu\text{M}$  and 3 $\mu\text{M}$  of Fasudil; 10 $\mu\text{M}$  and 30 $\mu\text{M}$  of Iniparib; 3 $\mu\text{M}$  and 10 $\mu\text{M}$  of PD151746; or 10 $\mu\text{M}$  and 30 $\mu\text{M}$  of ID-8. Cells were treated for 24h, 72h and 96h.

#### **1.5 - In vitro damage models and selection of final compound - only HPTECs:**

treatment with 0.1 $\mu\text{M}$ , 0.21 $\mu\text{M}$ , 0.46 $\mu\text{M}$ , 1 $\mu\text{M}$ , 2.1 $\mu\text{M}$ , 4.6 $\mu\text{M}$ , 10 $\mu\text{M}$ , 21 $\mu\text{M}$ , 46 $\mu\text{M}$  and 100 $\mu\text{M}$  of CGS21680; ZM336372; PD151746; or ID-8. Cells were treated for 96h.

**1.6 - Experiment with different DYRK inhibitors after damage - only HPTECs:**

treatment with 1 $\mu$ M of Harmaline; Harmane; Norharmane; AZ191; Harmine; ID-8; INDY; TC-S 7004; and TG 003. Cells were treated for 48h.

**1.7 - Dose-response experiments with ID-8 and Harmine - HPTECs and fibroblasts:**

treatment with 1 $\mu$ M, 0.1 $\mu$ M, 0.01 $\mu$ M, 0.001 $\mu$ M and 0.0001 $\mu$ M of ID-8 or Harmine. Cells were treated for 48h.

All compounds were dissolved in 100% DMSO in 10mM stock concentration and were added to the cells using D300 digital dispenser (Hewlett Packard). DMSO final concentration was normalized for all samples, except for control group which did not receive DMSO. Each experiment was performed using 3 biological replicates, in 3 technical replicates.

**1.8 - Cell isolation, culture and seeding in 3 dimensional microphysiological system (3D MPS) platform**

Healthy portions of the surgical specimen were dissected, stored at 4°C in Hanks balanced salt solution buffer containing penicillin-streptomycin, and processed for isolation of HPTECs within 24h. Confluent monolayer cultures of HPTECs with passage numbers 1 through 4 were suspended with 0.05% Trypsin-ethylenediamine tetraacetic acid, washed, counted, and resuspended at a concentration of 15 to 20  $\times 10^6$  cells/mL. Approximately 5  $\mu$ l of cell suspension were injected into the collagen IV-coated lumen of the 3D MPS platform (Nortis Inc.). Cells were allowed to adhere for 24 hours before

ID-8 stimulates tubular proliferation initiating media flow at 0.5  $\mu$ l/min. Cell coverage and integrity of the tubule structure were assessed under light microscopy on a weekly basis.

### **1.9 - Library preparation and RNA sequencing**

RNA samples were isolated using RNeasy plus (Qiagen) (n=3 /group) and were checked for quality (RIN value>8.0) and quantity using Agilent 2200 Bioanalyzer instrument and nanodrop (Thermo Scientific), respectively. RNA-seq libraries were prepared using Illumina TruSeq Stranded mRNA sample preparation kits (San Diego, CA) from 500ng of purified total RNA according to the manufacturer's protocol. The finished dsDNA libraries were quantified by Qubit fluorometer and the quality was assessed by Agilent Bioanalyzer 2200. Uniquely indexed libraries were pooled in equimolar ratios, which was quantitated by qPCR and then sequenced on two Illumina HiSeq High-Output run with single-end 75bp reads by the Biopolymers Facility at Harvard Medical School. All samples were processed using an RNA-seq pipeline implemented in the bcbio-nextgen project (<https://bcbio-nextgen.readthedocs.org/en/latest/>).<sup>1</sup> Raw reads were examined for quality issues using FastQC (<http://www.bioinformatics.babraham.ac.uk/projects/fastqc/>) to ensure library and sequencing suitability.

Reads were aligned to UCSC build mm10 of the *Mus musculus* genome, augmented with transcript information from Ensembl release 90 using STAR.<sup>2</sup> Alignments were checked for evenness of coverage, rRNA content, genomic context of alignments, complexity and other quality checks using a combination of FastQC, Qualimap,<sup>3</sup> MultiQC (<https://github.com/ewels/MultiQC>) and custom tools (Supplemental Figure 4A). Counts of reads aligning to known genes were generated by featureCounts.<sup>4</sup> Transcripts Per

ID-8 stimulates tubular proliferation  
Million (TPM) measurements per isoform were generated by quasi alignment using Salmon.<sup>5</sup> Data was loaded into R using bcbioRNASeq R package.<sup>6</sup> Covariate analysis, sample clustering and gene expression visualization were done with DEGreport R package.<sup>7</sup> Differential expression at the gene level was called with DESeq2,<sup>8</sup> using counts per gene estimated from the Salmon quasi alignments by tximport.<sup>9</sup> Lists of differentially expressed genes were examined for gene ontology (GO) and KEGG term enrichment with clusterProfiler.<sup>10</sup> In addition, a cut-off-free gene set enrichment analysis (GSEA) was performed using clusterProfiler and weighted fold change calculations from DESeq2.

### **1.10 Immunofluorescence**

In order to validate upregulated genes found in the transcriptomics study at the protein level cells after treatment were fixed in 4% paraformaldehyde for 20' and permeabilized with 100% ice cold methanol for 10'. Cells were blocked with Odyssey buffer (Li-cor) for 1h at room temperature and incubated with conjugated antibodies and 0.1 µg/ml Hoechst 33342 overnight at 4°C. After incubation cells were washed 2x with 1x PBS-T and 2X with 1x PBS.

To establish cell cycle phase we used a modified IF protocol previously described <sup>11</sup>. Briefly, four hours before fixing cells were pulsed with 10 µM of EdU (cycling cells, ThermoScientific) and with Live/Dead fixable far-red dead cell stain (LDR, 1:2000, ThermoScientific). After four hours of incubation cells were fixed, permeabilized and stained with anti-phospho-Histone H3 (chromosome condensation during mitosis) conjugated with Alexa 488 (Cell Signaling) and with 0.1 µg/ml of Hoechst 33342 (all nuclei) overnight at 4°C. After incubation cells were washed 2x with 1x PBS-T and 2X

ID-8 stimulates tubular proliferation with 1x PBS. Fluorescence imaging was performed using an Operetta High-Content Imaging System (PerkinElmer) at 10X magnification. Raw images were automatically analyzed for nuclei segmentation, intensity, roundness, border isolation and background (Columbus 2.4.2 Software, PerkinElmer). Twelve technical replicates were conducted on each biological replicate. Antibodies are listed in Supplemental Table 1.

### **1.11 - Western blot**

Cells were harvested and lysed with M-PER Mammalian Protein Extraction Reagent (ThermoScientific) + 1X Halt protease and phosphatase inhibitor cocktail (ThermoScientific). Protein concentrations were determined using the BCA protein assay kit (Pierce, ThermoScientific), and equal amount of protein (20µg/sample, n=5-6/group) was loaded and run on a pre-casted 4-20% polyacrylamide gel (Bio-rad) and transferred to PVDF membranes (Bio-rad). Membranes were blocked with 5% milk in 1x TBS-T (Cell signaling) for 1h at room temperature and incubated with primary rabbit monoclonal anti-DYRK1A (Cell Signaling) overnight at 4°C followed by horseradish peroxidase (HRP) linked anti-rabbit secondary antibody (Cell Signaling). For protein normalization membranes were striped with Restore™ Western Blot Stripping Buffer (ThermoScientific) for 5' and incubated with mouse monoclonal IgG anti-β-actin HRP linked (Santa Cruz) for 2h at room temperature. Bands were detected using enhanced chemiluminescence and captured with Synergy H1 Plate Reader (BioTek). Blots were quantified with the help of Image Studio Lite 5.2 software (Li-cor).

## 1.12 - References for Supplemental Methods

1. bcbio - nextgen. <https://bcbio-nextgen.readthedocs.io/en/latest/>.
2. Dobin A, Davis CA, Schlesinger F, et al. STAR: ultrafast universal RNA-seq aligner. *Bioinformatics*. 2013;29(1):15-21.
3. García-Alcalde F, Okonechnikov K, Carbonell J, et al. Qualimap: evaluating next-generation sequencing alignment data. *Bioinformatics*. 2012;28(20):2678-2679.
4. Liao Y, Smyth GK, Shi W. featureCounts: an efficient general purpose program for assigning sequence reads to genomic features. *Bioinformatics*. 2014;30(7):923-930.
5. Patro R, Duggal G, Love MI, Irizarry RA, Kingsford C. Salmon provides fast and bias-aware quantification of transcript expression. *Nat Methods*. 2017;14(4):417-419.
6. *bcbioRNASeq: R package for bcbio RNA-seq analysis* [computer program]. bcbioRNASeq: R package for bcbio RNA-seq analysis; 2017.
7. *Report of DEG analysis* [computer program]. Bioconductor version: Release (3.6); 2017.
8. Love MI, Huber W, Anders S. Moderated estimation of fold change and dispersion for RNA-seq data with DESeq2. *Genome Biol*. 2014;15(12):550.
9. Sonesson C, Love MI, Robinson MD. Differential analyses for RNA-seq: transcript-level estimates improve gene-level inferences. *F1000Res*. 2015;4:1521.
10. Yu G, Wang LG, Han Y, He QY. clusterProfiler: an R package for comparing biological themes among gene clusters. *OMICS*. 2012;16(5):284-287.
11. Hafner M, Niepel M, Subramanian K, Sorger PK. Designing Drug-Response Experiments and Quantifying their Results. *Curr Protoc Chem Biol*. 2017;9(2):96-116.

## 2 - Supplemental Tables

**Supplemental Table 1.** List of antibodies used for immunocytochemistry, immunofluorescence and western blot

| Protein            | Primary                                             | Dilution | Secondary                                        | Dilution |
|--------------------|-----------------------------------------------------|----------|--------------------------------------------------|----------|
| Ki-67              | ab15580, Abcam                                      | 1:100    | ab150080, Alexa Fluor, 594 Abcam                 | 1:1000   |
| Epcam              | ab20160, Abcam                                      | 1:100    | ab150117, Alexa Fluor 488, Abcam                 | 1:1000   |
| PCNA               | 8580, Alexa Fluor 488 conjugated, Cell Signaling    | 1:500    | -                                                | -        |
| E2F1               | AB208078, Alexa Fluor 555 conjugated, Abcam         | 1:500    | -                                                | -        |
| CCNB1              | SC-752, Alexa Fluor 488 conjugated, Santa Cruz      | 1:500    | -                                                | -        |
| CCNE2              | 50-9714-80, Alexa Fluor 647 conjugated, eBioscience | 1:500    | -                                                | -        |
| CCND1              | MA1-39546, ThermoScientific                         | 1:200    | ab150117, Alexa Fluor 488, Abcam                 | 1:1000   |
| Phospho-Histone H3 | 3465S, Alexa Fluor 488 conjugated, Cell Signaling   | 1:1000   | -                                                | -        |
| DYRK1A             | 2771, Cell Signaling                                | 1:1000   | 7074 Anti-rabbit IgG, HRP linked, Cell Signaling | 1:10000  |
| B-actin            | SC-47778, (C4) HRP linked, Santa Cruz               | 1:10000  | -                                                | -        |

**Supplemental Table 2.** List of the selected 129 hit compounds in the primary screen.

| ID | Compound Name                   | Pathway                    | Targets           | Replicate1 | Replicate2 | Average | Std Dev | CV    |
|----|---------------------------------|----------------------------|-------------------|------------|------------|---------|---------|-------|
| 1  | <b>SB505124</b>                 | TGF-beta/Smad              | TGF-beta/Smad     | 1.45       | 1.36       | 1.407   | 0.06    | 4.5%  |
| 2  | <b>GDC-0879</b>                 | MAPK                       | Raf               | 1.43       | 1.31       | 1.369   | 0.08    | 6.0%  |
| 3  | <b>GDC-0152</b>                 | Apoptosis                  | IAP               | 1.39       | 1.28       | 1.336   | 0.08    | 6.2%  |
| 4  | <b>BTZ043 Racemate</b>          | Others                     | Others            | 1.24       | 1.39       | 1.315   | 0.11    | 8.4%  |
| 5  | <b>N6022</b>                    | Others                     | Others            | 1.31       | 1.25       | 1.283   | 0.04    | 3.4%  |
| 6  | <b>SSR128129E</b>               | Angiogenesis               | FGFR              | 1.26       | 1.29       | 1.274   | 0.02    | 1.4%  |
| 7  | <b>Birinapant</b>               | Apoptosis                  | IAP               | 1.31       | 1.23       | 1.269   | 0.06    | 4.6%  |
| 8  | <b>TAK-438</b>                  | Transmembrane Transporters | Potassium Channel | 1.33       | 1.20       | 1.264   | 0.09    | 7.4%  |
| 9  | <b>Fasudil (HA-1077) HCl</b>    | Cell Cycle                 | ROCK, Autophagy   | 1.30       | 1.20       | 1.252   | 0.07    | 5.3%  |
| 10 | <b>Phenacetin</b>               | Neuronal Signaling         | COX               | 1.22       | 1.25       | 1.233   | 0.02    | 1.4%  |
| 11 | <b>Pritelivir (BAY 57-1293)</b> | Others                     | Others            | 1.21       | 1.24       | 1.222   | 0.02    | 1.6%  |
| 12 | <b>SC-514</b>                   | NF-κB                      | IκB/IKK           | 1.21       | 1.22       | 1.218   | 0.01    | 0.4%  |
| 13 | <b>ZM 336372</b>                | MAPK                       | Raf               | 1.22       | 1.20       | 1.209   | 0.01    | 1.0%  |
| 14 | <b>Asaraldehyde</b>             | Neuronal Signaling         | COX               | 1.14       | 1.62       | 1.379   | 0.34    | 24.6% |
| 15 | <b>Tolbutamide</b>              | Transmembrane Transporters | Potassium Channel | 1.15       | 1.57       | 1.360   | 0.30    | 22.2% |
| 16 | <b>SB525334</b>                 | TGF-beta/Smad              | TGF-beta/Smad     | 1.33       | 1.33       | 1.332   | 0.00    | 0.0%  |

## ID-8 stimulates tubular proliferation

| ID | Compound Name                | Pathway                    | Targets                        | Replicate1 | Replicate2 | Average | Std Dev | CV    |
|----|------------------------------|----------------------------|--------------------------------|------------|------------|---------|---------|-------|
| 17 | Rizatriptan Benzoate         | Neuronal Signaling         | 5-HT Receptor                  | 1.18       | 1.45       | 1.317   | 0.19    | 14.6% |
| 18 | Pancuronium dibromide        | Neuronal Signaling         | AChR                           | 1.53       | 1.07       | 1.299   | 0.32    | 24.7% |
| 19 | Imatinib (STI571)            | Protein Tyrosine Kinase    | PDGFR                          | 1.15       | 1.36       | 1.254   | 0.14    | 11.5% |
| 20 | Santacruzamate A (CAY10683)  | DNA Damage                 | HDAC                           | 1.32       | 1.18       | 1.250   | 0.10    | 8.3%  |
| 21 | Ronidazole                   | Others                     | Others                         | 1.32       | 1.17       | 1.244   | 0.11    | 8.5%  |
| 22 | AGI-5198                     | Metabolism                 | Dehydrogenase                  | 1.29       | 1.19       | 1.239   | 0.07    | 5.5%  |
| 23 | Iniparib (BSI-201)           | DNA Damage                 | PARP                           | 1.19       | 1.28       | 1.235   | 0.07    | 5.3%  |
| 24 | Scopine                      | Neuronal Signaling         | Adrenergic Receptor            | 1.06       | 1.40       | 1.230   | 0.25    | 20.0% |
| 25 | Tigecycline                  | Others                     | Others                         | 1.23       | 1.23       | 1.229   | 0.00    | 0.0%  |
| 26 | INCB024360                   | Metabolism                 | IDO                            | 1.29       | 1.16       | 1.227   | 0.09    | 7.7%  |
| 27 | Glipizide                    | Others                     | Others                         | 1.11       | 1.34       | 1.226   | 0.16    | 13.0% |
| 28 | Sulfanilamide                | Others                     | Others                         | 1.18       | 1.27       | 1.223   | 0.07    | 5.4%  |
| 29 | Tariquidar                   | Transmembrane Transporters | P-gp                           | 1.31       | 1.13       | 1.222   | 0.13    | 10.2% |
| 30 | Cefditoren Pivoxil           | Others                     | Others                         | 1.14       | 1.30       | 1.222   | 0.11    | 9.4%  |
| 31 | Trelagliptin                 | Proteases                  | DPP-4                          | 1.24       | 1.19       | 1.218   | 0.04    | 3.0%  |
| 32 | Nevirapine                   | Microbiology               | Reverse Transcriptase          | 1.25       | 1.18       | 1.214   | 0.05    | 4.5%  |
| 33 | CRT0044876                   | DNA Damage                 | APE                            | 1.25       | 1.17       | 1.212   | 0.06    | 4.8%  |
| 34 | Naloxone HCl                 | Neuronal Signaling         | Opioid Receptor                | 1.11       | 1.31       | 1.208   | 0.14    | 11.6% |
| 35 | FPH1 (BRD-6125)              | Others                     | Others                         | 1.38       | 1.04       | 1.207   | 0.24    | 19.8% |
| 36 | Valproic acid sodium salt    | Neuronal Signaling         | Autophagy,HDAC ,GABA Receptor  | 0.99       | 1.41       | 1.202   | 0.29    | 24.4% |
| 37 | Phenytoin sodium             | Transmembrane Transporters | Sodium Channel                 | 1.19       | 1.22       | 1.202   | 0.02    | 1.7%  |
| 38 | Praziquantel                 | Others                     | Others                         | 1.31       | 1.09       | 1.200   | 0.15    | 12.7% |
| 39 | Artemisinin                  | Others                     | Others                         | 1.24       | 1.15       | 1.197   | 0.07    | 5.4%  |
| 40 | Laquinimod                   | Others                     | Others                         | 1.31       | 1.08       | 1.192   | 0.16    | 13.7% |
| 41 | E-64                         | Proteases                  | Cathepsin K                    | 1.20       | 1.18       | 1.191   | 0.02    | 1.4%  |
| 42 | Oxytetracycline (Terramycin) | Others                     | Others                         | 1.21       | 1.17       | 1.189   | 0.03    | 2.7%  |
| 43 | Chlorothiazide               | Others                     | Others                         | 1.25       | 1.13       | 1.189   | 0.09    | 7.4%  |
| 44 | CORM-3                       | Others                     | Others                         | 1.14       | 1.23       | 1.189   | 0.06    | 5.3%  |
| 45 | Lincomycin HCl               | Others                     | Others                         | 1.17       | 1.20       | 1.189   | 0.02    | 1.8%  |
| 46 | Phenoxybenzamine HCl         | GPCR & G Protein           | Adrenergic Receptor            | 1.24       | 1.14       | 1.188   | 0.07    | 6.1%  |
| 47 | ID-8                         | Others                     | Others                         | 1.19       | 1.18       | 1.187   | 0.00    | 0.3%  |
| 48 | MM-102                       | Epigenetics                | Histone Methyltransferase      | 1.10       | 1.27       | 1.185   | 0.12    | 9.7%  |
| 49 | Metolazone                   | Others                     | Others                         | 1.27       | 1.09       | 1.183   | 0.13    | 10.8% |
| 50 | Pregnenolone                 | Endocrinology & Hormones   | Estrogen/progesterone Receptor | 1.18       | 1.18       | 1.182   | 0.00    | 0.2%  |
| 51 | Apocynin                     | Others                     | Others                         | 1.11       | 1.25       | 1.181   | 0.09    | 8.0%  |
| 52 | Tebipenem Pivoxil            | Others                     | Others                         | 1.18       | 1.19       | 1.180   | 0.01    | 0.6%  |
| 53 | HA14-1                       | Apoptosis                  | Bcl-2                          | 1.20       | 1.16       | 1.180   | 0.02    | 1.8%  |
| 54 | Probucol                     | Others                     | Others                         | 1.23       | 1.13       | 1.179   | 0.07    | 6.1%  |
| 55 | Nalidixic acid               | Others                     | Others                         | 1.22       | 1.14       | 1.178   | 0.05    | 4.5%  |
| 56 | Thiamet G                    | Others                     | Others                         | 1.21       | 1.15       | 1.178   | 0.04    | 3.6%  |
| 57 | Caspofungin Acetate          | Others                     | Others                         | 1.25       | 1.11       | 1.178   | 0.10    | 8.4%  |
| 58 | Atglistatin                  | Others                     | ATGL                           | 1.18       | 1.17       | 1.176   | 0.01    | 1.0%  |

## ID-8 stimulates tubular proliferation

| ID | Compound Name                   | Pathway                  | Targets                   | Replicate1 | Replicate2 | Average | Std Dev | CV    |
|----|---------------------------------|--------------------------|---------------------------|------------|------------|---------|---------|-------|
| 59 | Chloramphenicol                 | Others                   | Others                    | 1.20       | 1.16       | 1.176   | 0.03    | 2.4%  |
| 60 | (6-) ε-Aminocaproic acid        | Others                   | Others                    | 1.14       | 1.21       | 1.175   | 0.05    | 3.9%  |
| 61 | Epinephrine Bitartrate          | GPCR & G Protein         | Adrenergic Receptor       | 1.29       | 1.06       | 1.175   | 0.17    | 14.1% |
| 62 | Fluocinolone Acetonide          | Others                   | Others                    | 1.26       | 1.09       | 1.174   | 0.12    | 10.2% |
| 63 | Etomidate                       | Neuronal Signaling       | GABA Receptor             | 1.08       | 1.27       | 1.172   | 0.13    | 11.2% |
| 64 | PF-04620110                     | Metabolism               | Transferase               | 1.27       | 1.08       | 1.170   | 0.13    | 11.5% |
| 65 | Moroxydine HCl                  | Others                   | Others                    | 1.17       | 1.16       | 1.170   | 0.01    | 0.6%  |
| 66 | Meprednisone                    | Others                   | Others                    | 1.15       | 1.19       | 1.170   | 0.03    | 2.4%  |
| 67 | Mirtazapine                     | Others                   | Others                    | 1.25       | 1.09       | 1.169   | 0.11    | 9.5%  |
| 68 | Sodium Nitroprusside            | Others                   | Others                    | 1.18       | 1.16       | 1.169   | 0.02    | 1.6%  |
| 69 | NMDA (N-Methyl-D-aspartic acid) | Neuronal Signaling       | GluR                      | 1.22       | 1.11       | 1.169   | 0.08    | 6.5%  |
| 70 | Nefiracetam                     | Neuronal Signaling       | GABA Receptor             | 1.18       | 1.15       | 1.168   | 0.02    | 1.7%  |
| 71 | CGS 21680 HCl                   | Angiogenesis             | 5-alpha Reductase         | 1.28       | 1.05       | 1.168   | 0.16    | 14.1% |
| 72 | EPZ5676                         | Epigenetics              | Histone Methyltransferase | 1.17       | 1.16       | 1.167   | 0.01    | 1.0%  |
| 73 | FPH2 (BRD-9424)                 | Others                   | Others                    | 1.28       | 1.05       | 1.166   | 0.16    | 13.7% |
| 74 | Aminophylline                   | Metabolism               | PDE                       | 1.10       | 1.23       | 1.164   | 0.09    | 8.0%  |
| 75 | Bosentan Hydrate                | GPCR & G Protein         | Endothelin Receptor       | 1.16       | 1.17       | 1.162   | 0.01    | 0.8%  |
| 76 | D-Pantothenic acid              | Others                   | Others                    | 1.07       | 1.25       | 1.162   | 0.13    | 11.2% |
| 77 | Andarine                        | Endocrinology & Hormones | Androgen Receptor         | 1.01       | 1.31       | 1.160   | 0.21    | 17.7% |
| 78 | Methylprednisolone              | Others                   | Others                    | 1.05       | 1.26       | 1.158   | 0.15    | 12.9% |
| 79 | Articaine HCl                   | Others                   | Others                    | 1.14       | 1.18       | 1.157   | 0.03    | 2.2%  |
| 80 | Chlorpheniramine Maleate        | Neuronal Signaling       | Histamine Receptor        | 1.00       | 1.31       | 1.157   | 0.22    | 18.9% |
| 81 | Bepotastine Besilate            | Neuronal Signaling       | Histamine Receptor        | 1.02       | 1.29       | 1.155   | 0.19    | 16.8% |
| 82 | WY-14643 (Pirixinic Acid)       | Metabolism               | PPAR                      | 1.15       | 1.15       | 1.154   | 0.00    | 0.0%  |
| 83 | Penicillin G Sodium             | Others                   | Others                    | 1.16       | 1.15       | 1.154   | 0.00    | 0.2%  |
| 84 | Limonin                         | Others                   | Others                    | 1.22       | 1.08       | 1.149   | 0.10    | 8.6%  |
| 85 | PD 151746                       | Proteases                | Cysteine Protease         | 1.16       | 1.14       | 1.149   | 0.02    | 1.3%  |
| 86 | IM-12                           | PI3K/Akt/mTOR            | GSK-3                     | 1.21       | 1.09       | 1.149   | 0.08    | 7.0%  |
| 87 | Methoxsalen                     | Others                   | Others                    | 1.06       | 1.24       | 1.148   | 0.12    | 10.9% |
| 88 | Valganciclovir HCl              | Others                   | Others                    | 1.13       | 1.16       | 1.148   | 0.02    | 2.1%  |
| 89 | Naphazoline HCl                 | Neuronal Signaling       | Adrenergic Receptor       | 1.16       | 1.13       | 1.147   | 0.02    | 1.7%  |
| 90 | Acebutolol HCl                  | Neuronal Signaling       | Adrenergic Receptor       | 1.14       | 1.15       | 1.147   | 0.01    | 0.6%  |
| 91 | CK-636                          | Cytoskeletal Signaling   | Arp2/3                    | 1.26       | 1.02       | 1.141   | 0.17    | 14.8% |
| 92 | FH1(BRD-K4477)                  | Others                   | Others                    | 1.20       | 1.08       | 1.140   | 0.08    | 7.4%  |
| 93 | Eprosartan Mesylate             | Others                   | Others                    | 1.22       | 1.06       | 1.139   | 0.12    | 10.3% |
| 94 | Salicylanilide                  | Others                   | Others                    | 1.14       | 1.14       | 1.139   | 0.00    | 0.0%  |
| 95 | Isovaleramide                   | Others                   | Others                    | 1.20       | 1.08       | 1.138   | 0.09    | 7.6%  |
| 96 | Edoxaban                        | Metabolism               | Factor Xa                 | 1.12       | 1.15       | 1.138   | 0.02    | 1.7%  |
| 97 | Glycyrrhizic Acid               | Others                   | Others                    | 1.18       | 1.10       | 1.138   | 0.05    | 4.8%  |
| 98 | VGX-1027                        | Others                   | Others                    | 1.22       | 1.05       | 1.136   | 0.12    | 10.3% |
| 99 | BV-6                            | Apoptosis                | IAP                       | 1.21       | 1.07       | 1.136   | 0.10    | 8.7%  |

## ID-8 stimulates tubular proliferation

| ID  | Compound Name                       | Pathway                  | Targets                   | Replicate1 | Replicate2 | Average | Std Dev | CV    |
|-----|-------------------------------------|--------------------------|---------------------------|------------|------------|---------|---------|-------|
| 100 | Mitotane                            | Others                   | Others                    | 1.00       | 1.27       | 1.136   | 0.20    | 17.3% |
| 101 | TIC10                               | PI3K/Akt/mTOR            | Akt                       | 1.23       | 1.04       | 1.135   | 0.13    | 11.3% |
| 102 | Mdivi-1                             | Cytoskeletal Signaling   | Dynamin                   | 1.11       | 1.16       | 1.135   | 0.03    | 2.9%  |
| 103 | Semagacestat (LY450139)             | Proteases                | Gamma- secretase          | 1.16       | 1.10       | 1.133   | 0.04    | 3.7%  |
| 104 | Levofloxacin                        | Others                   | Others                    | 1.14       | 1.11       | 1.129   | 0.02    | 1.9%  |
| 105 | AEBSF HCl                           | Proteases                | Serine Protease           | 1.24       | 1.02       | 1.129   | 0.16    | 14.1% |
| 106 | Droperidol                          | Others                   | Others                    | 1.05       | 1.21       | 1.128   | 0.12    | 10.3% |
| 107 | Exemestane                          | Endocrinology & Hormones | Aromatase                 | 1.14       | 1.12       | 1.128   | 0.02    | 1.5%  |
| 108 | Isotretinoin                        | Metabolism               | Hydroxylase               | 1.25       | 1.00       | 1.126   | 0.18    | 15.8% |
| 109 | Ornidazole                          | Others                   | Others                    | 1.10       | 1.15       | 1.124   | 0.04    | 3.4%  |
| 110 | Betahistine 2HCl                    | Neuronal Signaling       | Histamine Receptor        | 1.23       | 1.02       | 1.123   | 0.14    | 12.8% |
| 111 | Troxipide                           | Others                   | Others                    | 1.10       | 1.15       | 1.123   | 0.03    | 2.7%  |
| 112 | Pifithrin- $\alpha$ (PFT $\alpha$ ) | Apoptosis                | p53,Autophagy             | 1.04       | 1.21       | 1.123   | 0.12    | 10.9% |
| 113 | Inosine                             | Others                   | Others                    | 1.22       | 1.02       | 1.123   | 0.14    | 12.6% |
| 114 | C646                                | Epigenetics              | Histone Acetyltransferase | 1.13       | 1.12       | 1.123   | 0.01    | 0.9%  |
| 115 | Dimethyl Fumarate                   | Others                   | Others                    | 1.10       | 1.15       | 1.122   | 0.03    | 2.9%  |
| 116 | Apixaban                            | Metabolism               | Factor Xa                 | 1.14       | 1.10       | 1.122   | 0.03    | 2.4%  |
| 117 | Amprolium HCl                       | Others                   | Others                    | 1.13       | 1.11       | 1.120   | 0.02    | 1.7%  |
| 118 | Erdosteine                          | Others                   | Others                    | 1.12       | 1.12       | 1.118   | 0.00    | 0.3%  |
| 119 | EPZ004777                           | Epigenetics              | Histone Methyltransferase | 1.04       | 1.20       | 1.117   | 0.11    | 10.1% |
| 120 | Prednisone                          | Others                   | Others                    | 1.12       | 1.11       | 1.115   | 0.01    | 0.8%  |
| 121 | Chloroprocaine HCl                  | Others                   | Others                    | 1.10       | 1.13       | 1.115   | 0.02    | 1.7%  |
| 122 | Empagliflozin (BI 10773)            | GPCR & G Protein         | SGLT                      | 1.12       | 1.10       | 1.113   | 0.01    | 1.3%  |
| 123 | Lafutidine                          | Neuronal Signaling       | Histamine Receptor        | 1.13       | 1.10       | 1.112   | 0.02    | 2.1%  |
| 124 | Dibenzothiophene                    | Others                   | Others                    | 1.12       | 1.10       | 1.111   | 0.02    | 1.5%  |
| 125 | Etravirine (TMC125)                 | Microbiology             | Reverse Transcriptase     | 1.02       | 1.21       | 1.110   | 0.13    | 12.1% |
| 126 | Risperidone                         | Neuronal Signaling       | 5-HT Receptor             | 1.22       | 1.00       | 1.109   | 0.16    | 14.5% |
| 127 | Emtricitabine                       | Microbiology             | Reverse Transcriptase     | 1.20       | 1.02       | 1.107   | 0.13    | 11.7% |
| 128 | SB216763                            | PI3K/Akt/mTOR            | GSK-3                     | 1.11       | 1.10       | 1.104   | 0.01    | 0.8%  |
| 129 | Vitamin B12                         | Others                   | Others                    | 1.11       | 1.10       | 1.103   | 0.01    | 0.6%  |

**Supplemental Table 3.** Fold change and *p* values of cell cycle proteins modulated by the treatment with ID-8 or Harmine after different types of damage

|               | ID-8 (1μM)                  |                 |                |                | Harmine (1μM)               |                 |                |              |
|---------------|-----------------------------|-----------------|----------------|----------------|-----------------------------|-----------------|----------------|--------------|
|               | CdCl <sub>2</sub><br>(15μM) | CycloA<br>(5μM) | PMB<br>(75μM)  | Hypoxia        | CdCl <sub>2</sub><br>(15μM) | CycloA<br>(5μM) | PMB<br>(75μM)  | Hypoxia      |
| <b>PCNA*</b>  | 1.3/<br>0.0001              | 1.4/<br>0.0001  | 1.1/<br>0.0001 | 1.1/<br>0.0001 | 1.16/<br>0.0001             | 1.3/<br>0.0001  | 1.1/<br>0.0001 | 1.1/<br>0.03 |
| <b>E2F1*</b>  | 1.2/<br>0.0001              | 1.3/<br>0.0001  | 1.1/<br>0.0001 | 1.2/<br>0.0003 | NS                          | 1.2/<br>0.0001  | 1.1/<br>0.0001 | NS           |
| <b>CCNB1*</b> | NS                          | 1.2/<br>0.01    | 1.1/<br>0.02   | 1.3/<br>0.01   | NS                          | NS              | NS             | NS           |
| <b>CCNE2*</b> | 1.4/<br>0.004               | 1.5/<br>0.005   | NS             | NS             | 1.3/<br>0.02                | NS              | NS             | NS           |

\*Fold Change to untreated group (EGF-free medium)/adjusted *p* values

### 3 - Supplemental Figures

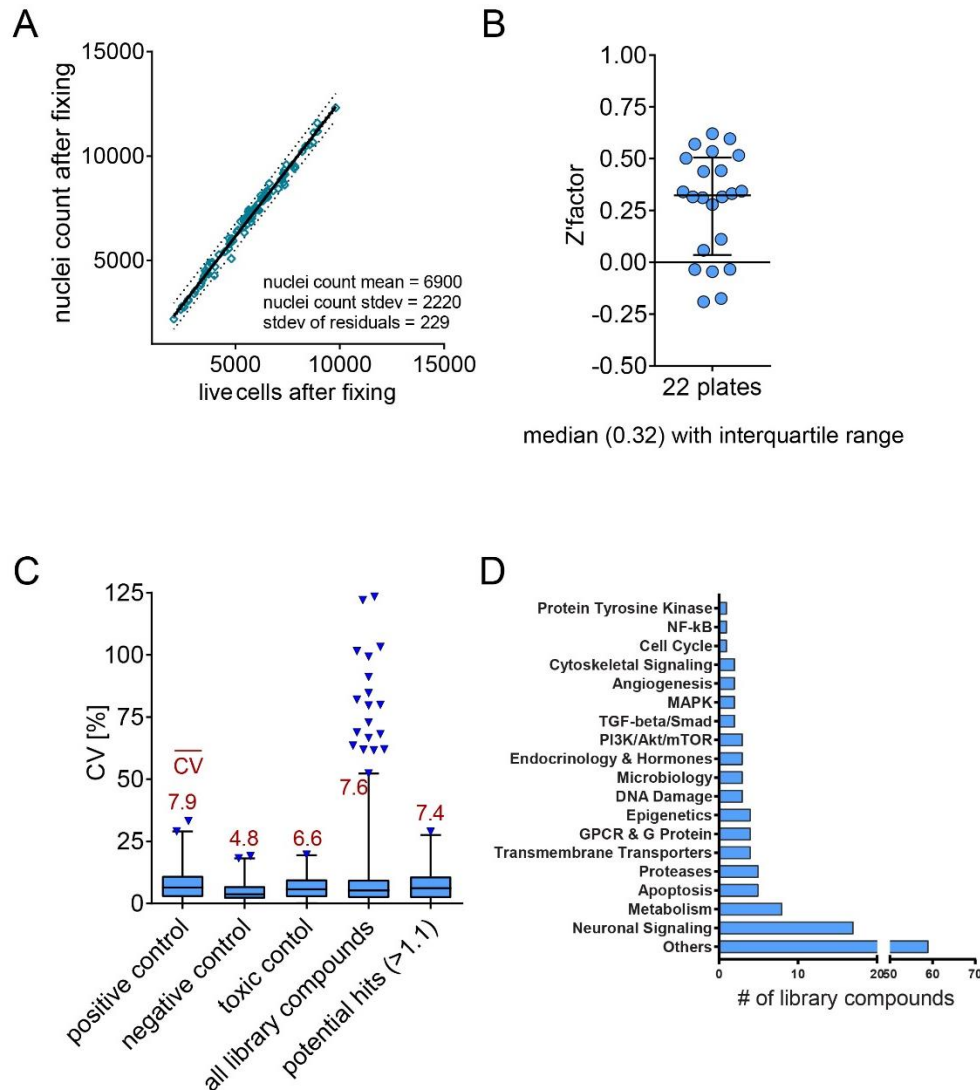

**Supplemental Figure 1. Primary screen shows compounds with potential pro-proliferative effects in primary human proximal tubular epithelial cells (HPTECs).**

A-C) Primary screen quality control. D) Main pathways activated by the hit compounds.

## ID-8 stimulates tubular proliferation

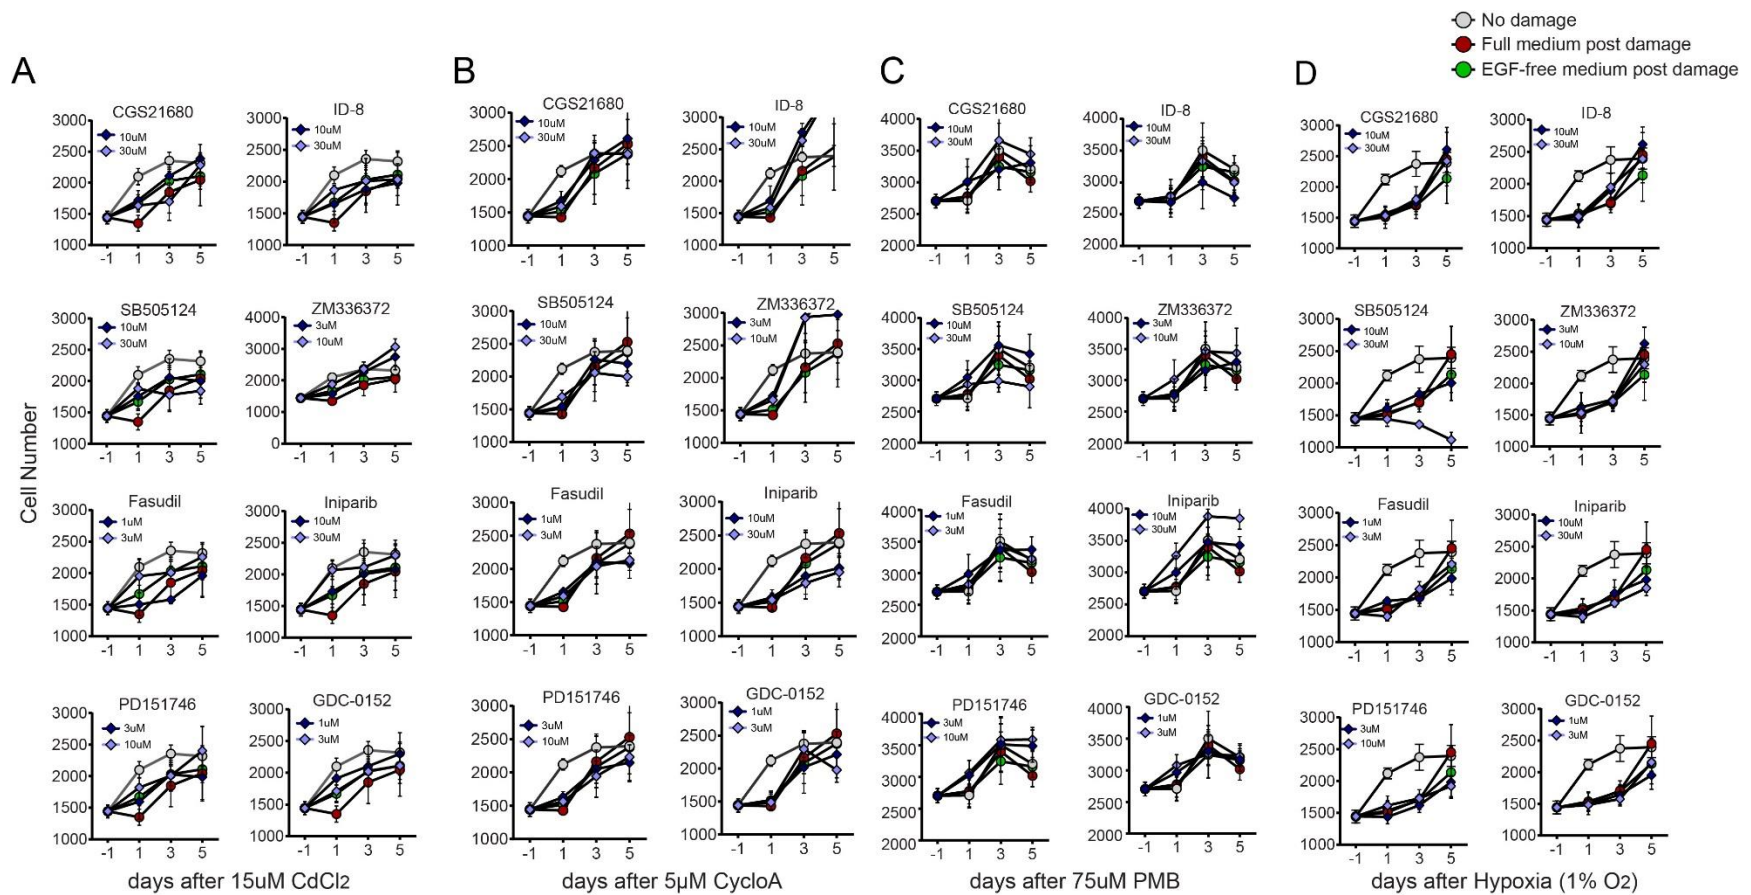

**Supplemental Figure 2. Compounds CGS21680, ZM336372, PD151746 and ID-8 promoted proliferation of primary human proximal tubular epithelial cells (HPTECs) in, at least, two types of damage.** Selection of the compounds promoting cell proliferation after damage with A) 15µM of CdCl<sub>2</sub>; B) 5µM of cyclosporine A; C) hypoxia (1% O<sub>2</sub>) and 75µM of polymyxin B. Data are represented as mean ± SEM of the total cell number. n=3/group, 3 biological replicates

## ID-8 stimulates tubular proliferation

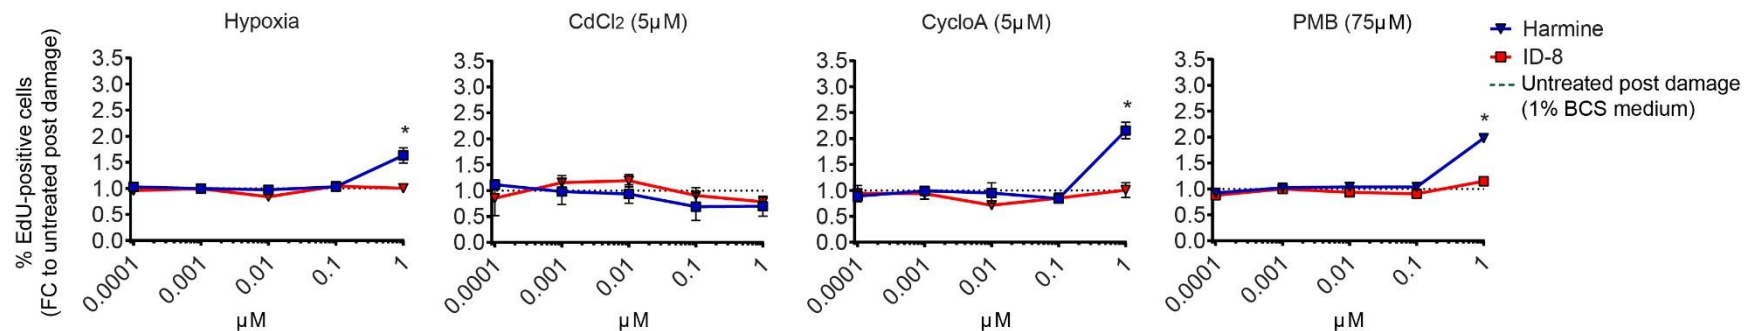

### Supplemental Figure 3. DYRK1A inhibitor ID-8 does not promote proliferation of NIH/3T3 fibroblasts after

**damage.** Dose response curve after 48h of treatment with ID-8 and Harmine in NIH/3T3 fibroblasts after 24h of damage with hypoxia (1% O<sub>2</sub>), 5μM of CdCl<sub>2</sub>, 5μM of cyclosporine A (CycloA), or 75μM of polymyxin B (PMB) (n= 3/group, 2 biological replicates). EdU-positive cells were normalized to the total cell number per well. Data are presented as mean ± SEM of the fold change over the untreated group (1% bovine calf serum medium, BCS). \**P*<0.05 after correction for multiple comparisons.

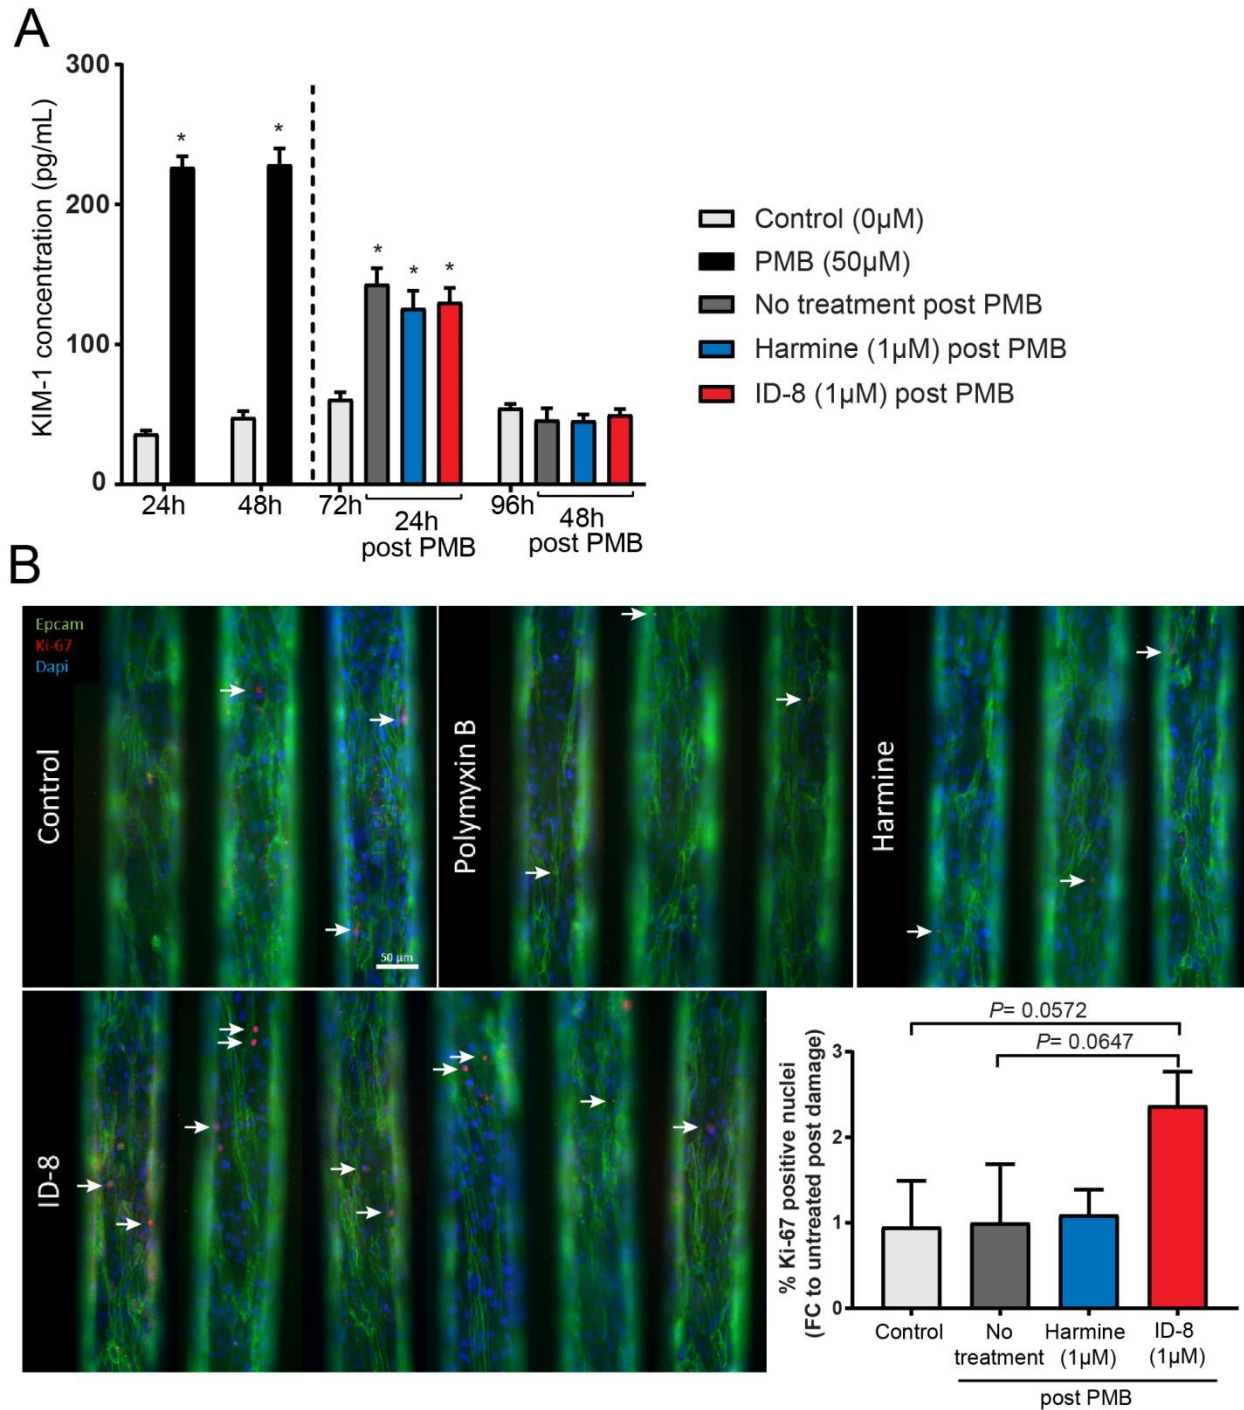

**Supplemental Figure 4. ID-8 promotes proliferation of primary human proximal tubular epithelial cells (HPTECs) in 3 dimensional microphysiological system (3D MPS).** (A) KIM-1 expression in effluents from devices: without damage (control) for 24h, 48h, 72h and 96h and damaged with 50µM of polymyxin B (PMB) for 24h and 48h

## ID-8 stimulates tubular proliferation

followed by 24h and 48h of polymyxin B washout (no treatment) or treatment with 1 $\mu$ M of Harmine or ID-8; (B) Ki-67 (white arrows) and epcam staining (green) in 3D MPS maintained in EGF-free medium (control) or damaged with 50 $\mu$ M of polymyxin B (PMB) followed by 48h treatment with 1 $\mu$ M of Harmine or ID-8 or no treatment (EGF-free medium) (\*P< 0.05 after multiple comparisons). n=3-6 biological replicates/group

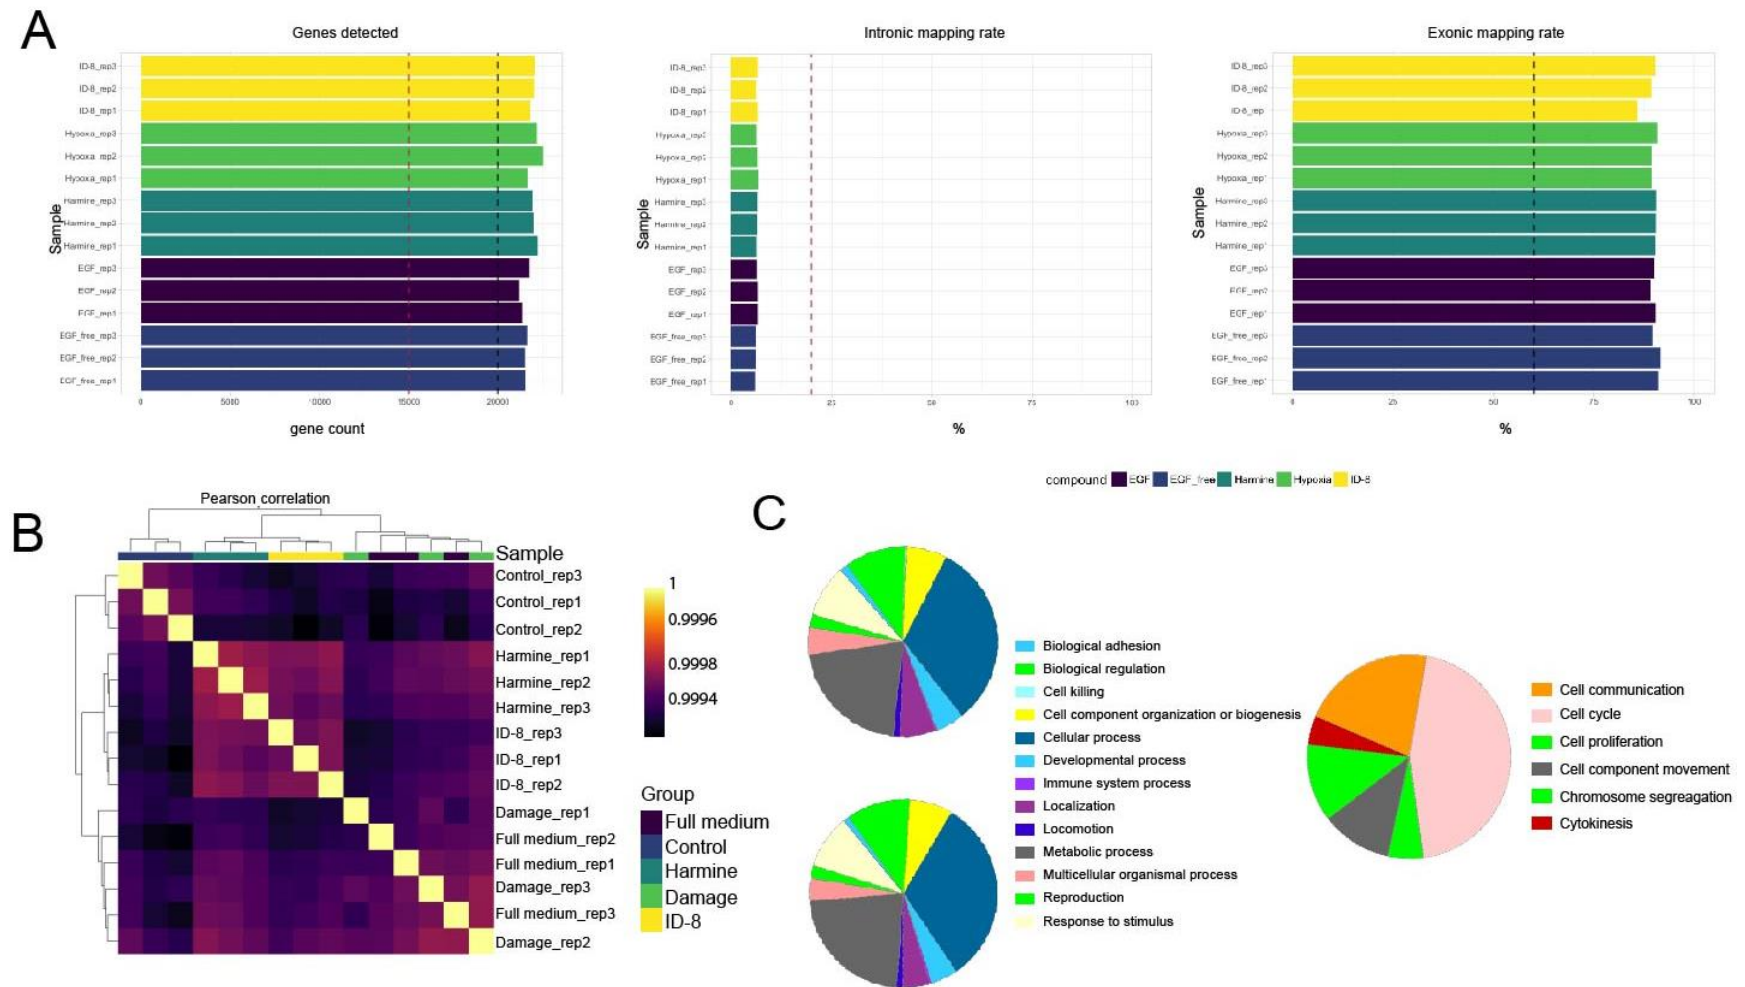

**Supplemental Figure 5. RNA sequencing identifies differentially expressed genes after ID-8 and Harmine treatment post-damage.** A) RNAseq analysis quality control showing the number of detected genes, low intronic and

ID-8 stimulates tubular proliferation

high exonic mapping rates for the tested samples. B) Sample-sample correlation heat map showing intra-group variation.

C) Panther classification system of the most upregulated genes after treatment with 1uM of ID-8 or Harmine
