# Supplementary material
Source: PubMed Central journal article supplement (PMC6287872)
Supplement: ASN.2018040392SupplementaryData2.pdf [file ASN.2018040392SupplementaryData2.pdf]

## **SIGNIFICANCE STATEMENT**

One potential therapeutic strategy for treating AKI, apart from supportive care, dialysis, and transplantation, is stimulating the proliferation of proximal tubular epithelial cells. The authors describe use of high-throughput screening to identify ID-8, an inhibitor of dual-specificity tyrosine-phosphorylation-regulated kinase 1A (DYRK1A), as a first-in-class compound that stimulates kidney tubular epithelial cell proliferation after different types of acute damage in two- and three-dimensional *in vitro* models. They also provide *in vitro* evidence that ID-8 is able to bind DYRK1A in primary human proximal tubular epithelial cells and stimulate proliferation after injury by upregulating cell cycle mediators. This early-stage discovery study identifies ID-8 as a potential therapeutic candidate to stimulate regeneration and repair of epithelial cells in the kidney after acute damage.
